# Supplementary material for: Ligand identification of the adenosine A2Areceptor in self-assembled nanodiscs by affinity mass spectrometry
Source: Royal Society of Chemistry journal article supplement (doi:10.1039/c7ay01891f), 2017-01-01
Supplement: c7ay01891f1.pdf [file c7ay01891f1.pdf]

A

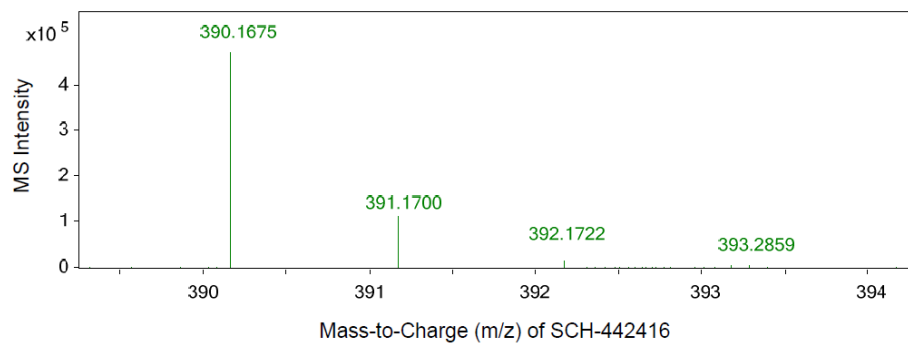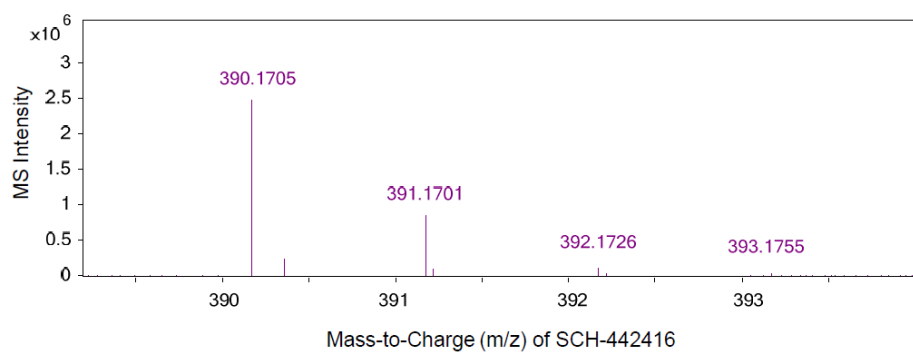

B

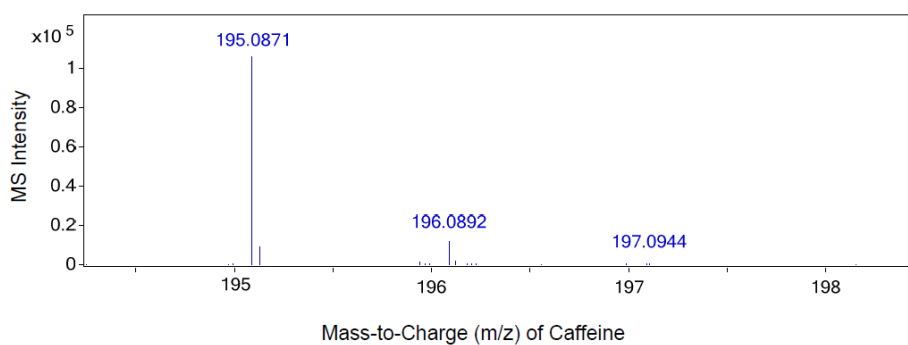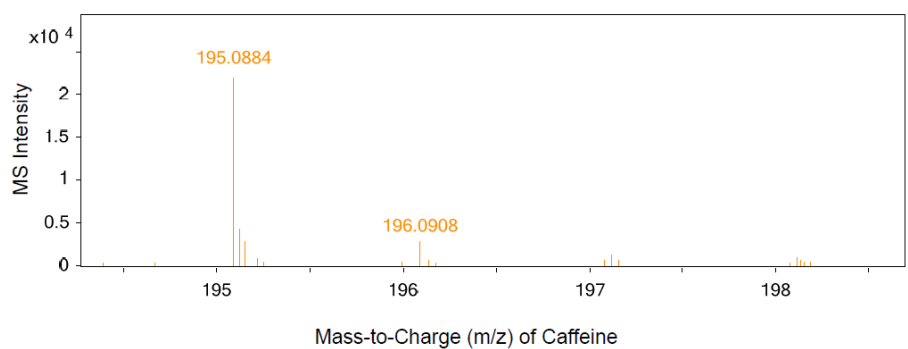

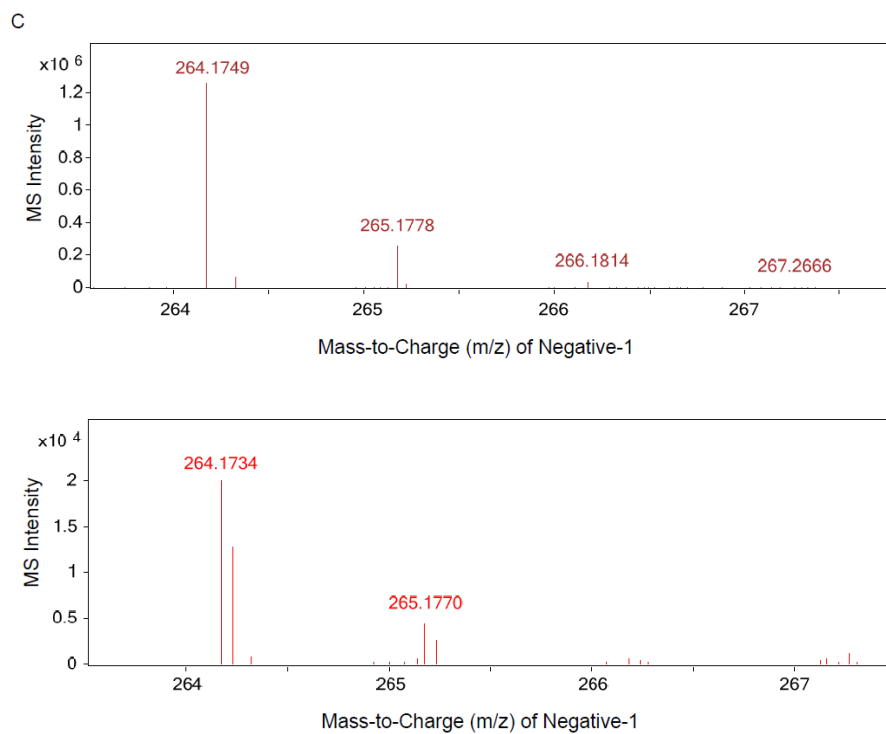

Figure S1: The high-resolution MS spectra of SCH-442416(A), caffeine (B) and compound Negative-1 (C). Upper spectra were acquired from the pure standards and the lower spectra from compounds detected in the  $A_{2A}R$  nanodisc samples. The theoretical m/z for the monoisotopic peak of SCH-442416, caffeine and Negative-1 is 390.1673, 195.0877 and 264.1747, respectively.
